# Supplementary material for: Time course of lymphocyte repopulation after dimethyl fumarate-induced grade 3 lymphopenia: contribution of patient age
Source: PubMed Central journal article supplement — Ther Adv Neurol Disord. 2019 May 8;12:1756286419843450. doi: 10.1177/1756286419843450 (PMC6506915; doi:10.1177/1756286419843450), 2019-05-08
Supplement: supplementary_table_1.pdf [file supplementary_table_1.pdf]

| Patient No. | Regular medication, classified by reported potential for induction of leukopenia |                                                                                                                              |
|-------------|----------------------------------------------------------------------------------|------------------------------------------------------------------------------------------------------------------------------|
|             | often                                                                            | occasional/seldom or no                                                                                                      |
| 1           |                                                                                  |                                                                                                                              |
| 2           |                                                                                  | levothyroxine, insulin degludec, insulin lispro                                                                              |
| 3           |                                                                                  | aripiprazole, levothyroxine, duloxetine, trazodone, candesartan/hydrochlorothiazide, clidinium/chlordiazepoxide, vitamin B12 |
| 4           |                                                                                  | allopurinol                                                                                                                  |
| 5           |                                                                                  | vitamin D, fesoteridine                                                                                                      |
| 6           | carbamazepine                                                                    | baclofen, tamsulosin,                                                                                                        |
| 7           |                                                                                  | contraceptive transdermal                                                                                                    |
| 8           |                                                                                  |                                                                                                                              |
| 9           |                                                                                  | nifedipine, losartan/hydrochlorothiazide, metoprolol, pantoprazole, vitamin D, ginseng                                       |
| 10          |                                                                                  |                                                                                                                              |
| 11          | clozapine                                                                        | calcium/vitamin D, pantoprazole, flupentixol, phenprocoumon, sertraline, metoprolol, midodrine                               |

Supplementary table 1: Regular co-medication of patients with grade 3 lymphopenia.

All medications taken on a daily basis are declared and classified by their reported potential to induce leukopenia, as lymphopenia is not specifically mentioned for any of the drugs: According to the Swiss pharmaceuticals compendium often is defined as  $\geq 1/100$  -  $< 1/10$  and occasional/seldom as  $< 1/100$  ([www.compendium.ch](http://www.compendium.ch)).
