# Supplementary material for: Time course of lymphocyte repopulation after dimethyl fumarate-induced grade 3 lymphopenia: contribution of patient age
Source: PubMed Central journal article supplement — Ther Adv Neurol Disord. 2019 May 8;12:1756286419843450. doi: 10.1177/1756286419843450 (PMC6506915; doi:10.1177/1756286419843450), 2019-05-08
Supplement: supplementary_table_2.pdf [file supplementary_table_2.pdf]

| Patient No. | 1 <sup>st</sup> FU medication                                                     | reason for stopping FU medication | 2 <sup>nd</sup> FU medication |
|-------------|-----------------------------------------------------------------------------------|-----------------------------------|-------------------------------|
| 1           | DMF 240mg bid                                                                     | lymphopenia                       | teriflunomide                 |
| 2           | glatiramer acetate                                                                | liver enzymes elevated            | fingolimod                    |
| 3           | peginterferon beta-1a                                                             | lymphopenia                       | not yet decided               |
| 4           | glatiramer acetate                                                                | continued                         |                               |
| 5           | DMF 120mg bid                                                                     | continued                         |                               |
| 6           | DMF 240mg bid                                                                     | lymphopenia                       | fingolimod                    |
| 7           | DMF 120mg bid                                                                     | relapse                           | natalizumab                   |
| 8           | DMF with transient (12 months) dose reduction to 120mg bid, followed by 240mg bid | continued                         |                               |
| 9           | none                                                                              | lost to FU                        |                               |
| 10          | teriflunomide                                                                     | continued                         |                               |
| 11          | glatiramer acetate after treatment free period of 13 months                       | continued                         |                               |

Supplementary table 2: Follow-up medications after recovery of DMF-induced Grade 3 Lymphopenia; Abbreviations: FU: follow up, DMF: dimethyl fumarate, bid: bis in die
